# Supplementary material for: A red luminescent europium metal organic framework (Eu-MOF) integrated with a paper strip using smartphone visual detection for determination of folic acid in pharmaceutical formulations
Source: Royal Society of Chemistry journal article supplement (doi:10.1039/d2nj00601d), 2022-01-01
Supplement: d2nj00601d1.pdf [file d2nj00601d1.pdf]

## Electronic Supplementary Material

### **Red Luminescent Europium Metal Organic Framework (Eu-MOF) Integrated with Paper Strip Using Smartphone Visual Detection for Determination of Folic Acid in Pharmaceutical Formulations**

**Kawan F. Kayani<sup>a</sup> and Khalid M. Omer<sup>\*a</sup>**

<sup>a</sup> Center for biomedical Analysis, Department of Chemistry, College of Science, University of Sulaimani, Qliasan St, 46002, Slemani City, Kurdistan Region, Iraq.

**Corresponding address:** [khalid.omer@univsul.edu.iq](mailto:khalid.omer@univsul.edu.iq)

**Table of contents:**

**Figure 1S.** SEM images of the solid Eu-MOF.....3

**Figure 2S.** The stability of the prepared Eu-MOF. ....3

**Figure 3S.** The stability of the prepared Eu-MOF in different solvents. ....4

**Figure 4S.** The stability of the Eu-MOF in various solvents (Bar graph). ....4

**Figure 5S.** The fluorescence intensity of the paper strips after immersed in the FA solutions. ....5

**Figure 6S.** The recovery dates of the paper strips in real samples.....5

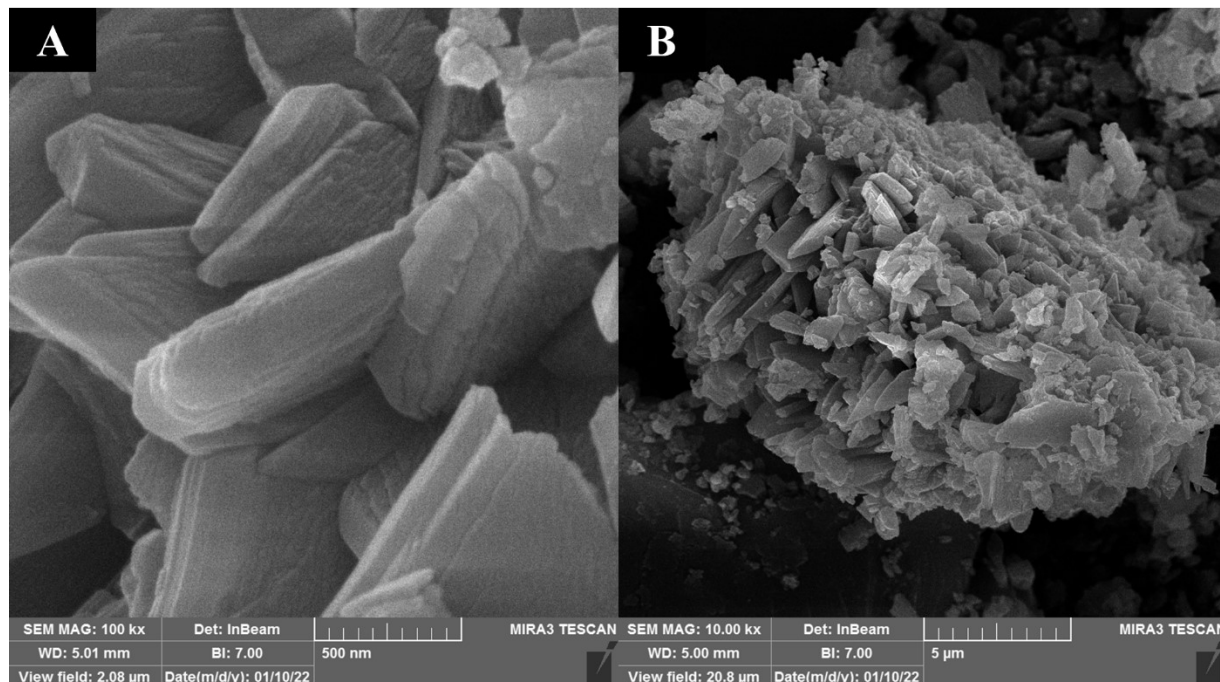

Figure 1S. SEM images of the solid Eu-MOF.

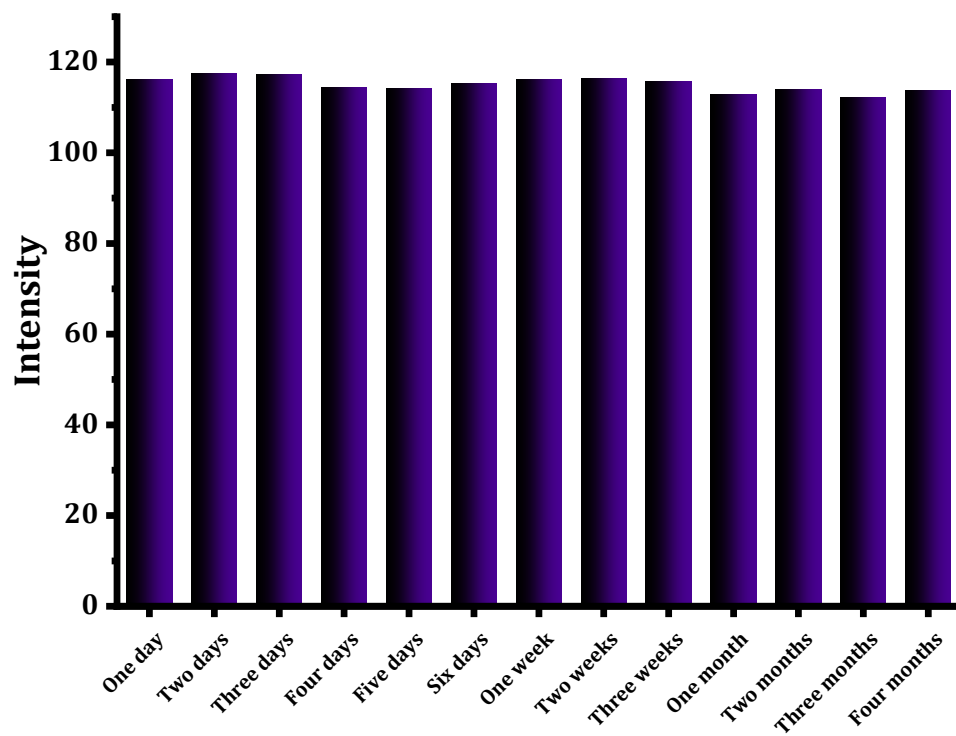

Figure 2S. The stability of the prepared Eu-MOF.

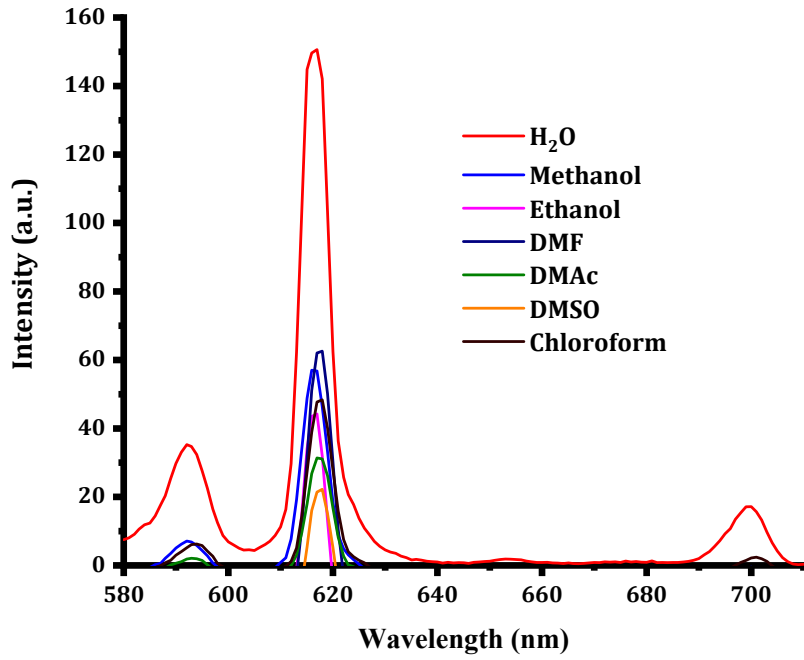

**Figure 3S.** The stability of the prepared Eu-MOF in different solvents.

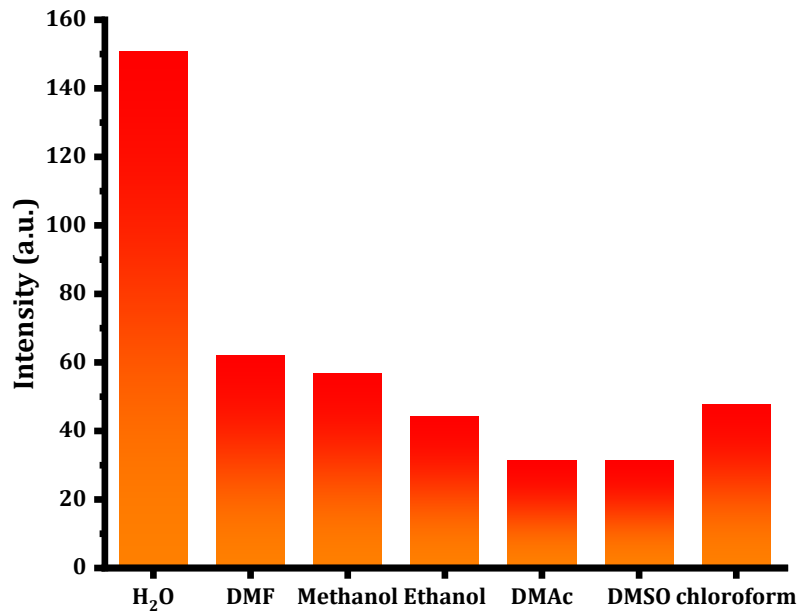

**Figure 4S.** The stability of the Eu-MOF in various solvents (Bar graph).

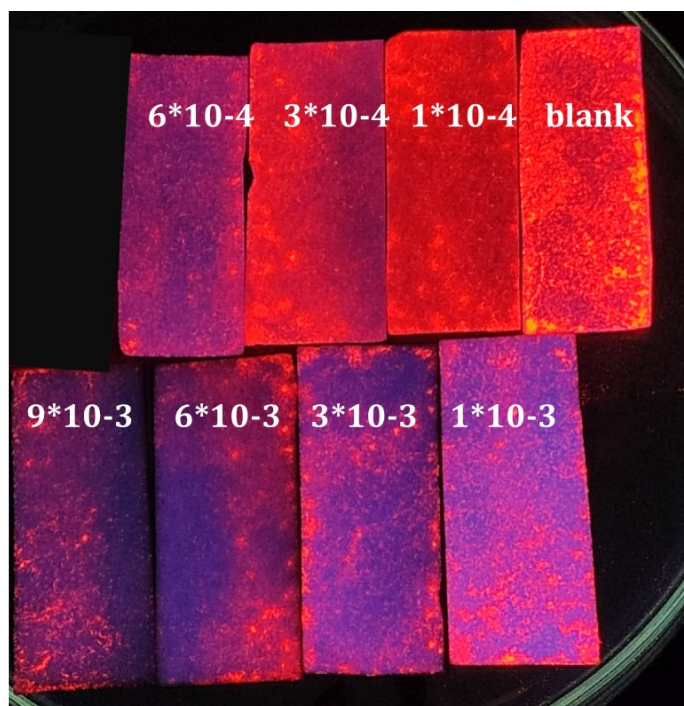

**Figure 5S.** The fluorescence intensity of the paper strips after immersed in the FA solutions.

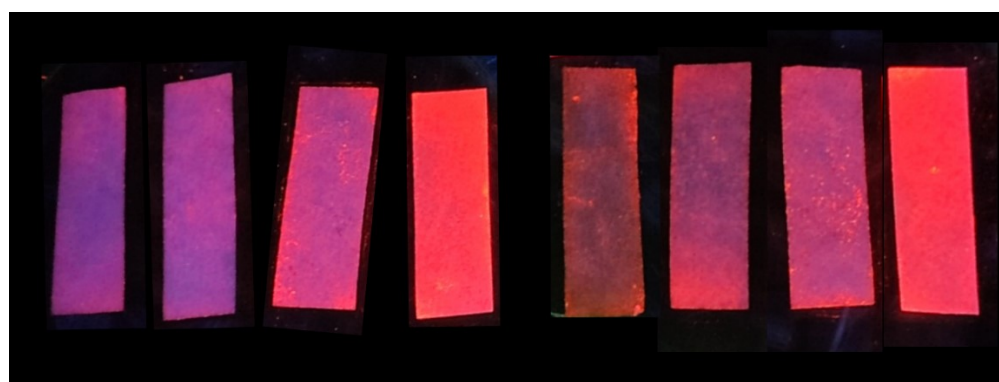

**Figure 6S.** The recovery dates of the paper strips in real samples.
